# Supplementary material for: An Economic Analysis of Transjugular Intrahepatic Portosystemic Covered Stent Shunt for Variceal Bleeding and Refractory Ascites in a Spanish Setting
Source: PubMed Central journal article supplement — Adv Ther. 2023 May 9;40(7):3006–20. doi: 10.1007/s12325-023-02517-x (PMC10272260; doi:10.1007/s12325-023-02517-x), 2023-05-09
Supplement: 12325_2023_2517_MOESM1_ESM.pdf [file 12325_2023_2517_MOESM1_ESM.pdf]

Title: An economic analysis of transjugular intrahepatic portosystemic covered stent shunt for variceal bleeding and refractory ascites in a Spanish setting

**Authors:** Rafael Bañares<sup>1,2,3</sup>, Agustín Albillos<sup>4,5</sup>, Mitesh Nakum<sup>6</sup>, Salvador Gea<sup>7</sup>, Angel Varghese<sup>8</sup>, William Green<sup>8</sup>

**Affiliations:**

<sup>1</sup> Servicio de Medicina de Aparato Digestivo. Hospital General Universitario Gregorio Marañón. Instituto de Investigación Sanitaria Gregorio Marañón, Madrid, Spain.

<sup>2</sup> Universidad Complutense de Madrid, Madrid, Spain.

<sup>3</sup> Centro de Investigación Biomédica en Red de Enfermedades Hepáticas y Digestivas (CIBERehd), Instituto de Salud Carlos III, Madrid, Spain.

<sup>4</sup> Departamento de Gastroenterología y Hepatología, Hospital Universitario Ramón y Cajal, Instituto Ramón y Cajal de Investigación Sanitaria (IRYCIS), Madrid, Spain.

<sup>5</sup> Centro de Investigación Biomédica en Red de Enfermedades Hepáticas y Digestivas (CIBERehd), Instituto de Salud Carlos III, Madrid, Spain.

<sup>6</sup> W L Gore & Associates Ltd, Newark, United States

<sup>7</sup> W. L. Gore y Asociados, SL, Barcelona, Spain.

<sup>8</sup> York Health Economics Consortium Ltd, York, United Kingdom.

**Corresponding author**

Name: Angel Varghese

Email address: angel.varghese@york.ac.uk

Address: Enterprise House, Innovation Way University of, York YO10 5NQ

# Supplementary Material

## Cost-effectiveness of transjugular intrahepatic portosystemic covered stent shunt for variceal bleeding and refractory ascites in a Spanish setting

### Table of Contents

|                                                                                                                                                                    |    |
|--------------------------------------------------------------------------------------------------------------------------------------------------------------------|----|
| Title: An economic analysis of transjugular intrahepatic portosystemic covered stent shunt for variceal bleeding and refractory ascites in a Spanish setting ..... | 1  |
| <b>A: Treatment Costs</b> .....                                                                                                                                    | 3  |
| <i>TIPSS procedure costs</i> .....                                                                                                                                 | 3  |
| <i>EBL treatment costs (Indication 1 – AVB)</i> .....                                                                                                              | 3  |
| <i>LVP treatment cost (indication 2 – refractory ascites)</i> .....                                                                                                | 4  |
| <b>B. Adverse Event Costs</b> .....                                                                                                                                | 5  |
| <i>Shunt dysfunction</i> .....                                                                                                                                     | 5  |
| <i>Variceal bleeding</i> .....                                                                                                                                     | 5  |
| <i>Ascites</i> .....                                                                                                                                               | 6  |
| <i>Hepatic Encephalopathy (HE)</i> .....                                                                                                                           | 6  |
| <i>Spontaneous Bacterial Peritonitis (SBP)</i> .....                                                                                                               | 7  |
| <b>C: Sensitivity and Scenario Analysis Inputs</b> .....                                                                                                           | 8  |
| <i>Scenario analysis – AVB (indication 1)</i> .....                                                                                                                | 13 |
| <b>D: Probabilistic Results</b> .....                                                                                                                              | 14 |
| <i>Indication 1 (AVB)</i> .....                                                                                                                                    | 14 |
| <i>Indication 2 (RA)</i> .....                                                                                                                                     | 14 |
| <b>References</b> .....                                                                                                                                            | 16 |

## A: Treatment Costs

### TIPSS procedure costs

The cost breakdown and total cost associated with TIPSS treatment is detailed in Table S1 below.

TIPSS procedure consumables include antibiotics and general anaesthetic. 1g of Ceftriaxone is administered intravenously for surgical prophylaxis. Unit cost per 100 1 gram vials was €286.70 [1]. 100mg of propofol (general anaesthetic) was applied in the model.

According to expert opinion diagnostic procedure costs are applicable for both elective and non-elective cases. Repeat implantations are associated with 2 bed days in hospital, based on expert opinion. Technical failure of initial TIPSS application is associated with additional procedure time of 2 hours for all relevant HCPs involved.

**Table S1: TIPSS procedural costs per person**

|                                                                      | Units | Total cost       | Source (units; costs) |
|----------------------------------------------------------------------|-------|------------------|-----------------------|
| <b>Consumables</b>                                                   |       |                  |                       |
| All procedure consumables <sup>a</sup>                               | 1.00  | €4,019.44        | KOLs; [2]             |
| <b>Diagnostic procedures</b>                                         |       |                  |                       |
| Abdomen CT scan                                                      | 0.80  | €124.00          | KOLs; [3]             |
| Doppler ultrasound                                                   | 1.00  | €67.00           |                       |
| Echocardiogram                                                       | 0.50  | €46.00           |                       |
| Electrocardiogram                                                    | 1.00  | €150.00          |                       |
| <b>Healthcare professionals time: pre-procedure (units in hours)</b> |       |                  |                       |
| Hepatologist                                                         | 0.17  | €4.21            | KOLs; [4]             |
| Radiologist                                                          | 0.17  | €4.21            |                       |
| <b>Healthcare professionals time: procedure (units in hours)</b>     |       |                  |                       |
| Radiologist                                                          | 2.00  | €50.54           | KOLs; [4]             |
| Radiologist trainee                                                  | 2.00  | €23.66           |                       |
| Radiographer                                                         | 2.00  | €33.84           |                       |
| Nurse                                                                | 4.00  | €96.92           |                       |
| Anaesthetist                                                         | 2.00  | €50.54           |                       |
| <b>Hospital excess bed days</b>                                      |       |                  |                       |
| Elective cases                                                       | 2.00  | €1,176.00        | KOLs; [3]             |
| Non-elective cases                                                   | 5.00  | €2,940.00        |                       |
| <b>Total costs (elective)</b>                                        |       | <b>€5,851.99</b> |                       |
| <b>Total costs (non-elective)</b>                                    |       | <b>€7,615.99</b> |                       |

<sup>a</sup> Consumables include: VIATORR stent, TIPs kit, antibiotics, balloon catheter, X-ray, and propofol.

### EBL treatment costs (Indication 1 – AVB)

The cost breakdown and total cost associated with EBL treatment is detailed in Table S2 below.

Everyone undergoing EBL was assumed to receive pharmaceutical treatment with either carvedilol or propranolol. Total cost was based on administering pharmaceuticals for 12 months. People on EBL treatment underwent four outpatient EBL sessions, 2 in the first month and 2 and in the second month, following the initial EBL session at first bleeding. People who did not suffer a further bleeding episode also received subsequent management with additional EBL sessions at 6, 12, and 24 months.

**Table S2: Costs per person for people receiving endoscopic band ligation plus pharmaceuticals**

|                                                 | Dose/units  | Total cost        | Source (units; costs) |
|-------------------------------------------------|-------------|-------------------|-----------------------|
| <b>Pharmaceuticals (total costs per month)*</b> |             |                   |                       |
| Carvedilol                                      | 25 mg daily | € 6.56            | KOLs; [1]             |
| Propranolol                                     | 40 mg daily | € 1.23            |                       |
| <b>Endoscopic band ligation</b>                 |             |                   |                       |
| Outpatient EBL (follow up)                      | 7           | € 4,689.30        | KOLs; [5]             |
| <b>Total costs (24-month survival)</b>          |             | <b>€ 4,750.80</b> |                       |

\* Proportion using carvedilol = 25%, propranolol = 75%.

### *LVP treatment cost (indication 2 – refractory ascites)*

The cost breakdown and total cost associated with LVP treatment is detailed in Table S3 below.

All consumable costs, excluding human albumin, were informed by expert opinion (based on a consultant in the purchasing department of a public hospital group in Catalonia). Human albumin cost per procedure is based on a total dose of 73.6 g, based on expert opinion. The unit cost for a 50 ml solution containing 10g of albumin was €36.90 [1].

People on TIPSS require 1.1 LVP sessions on average in the first month after TIPSS to drain the accumulation of fluid that occurred prior to implantation. This is based on evidence from Bureau et al. (2017) [6], where, for a sample of 29 people who underwent TIPSS, 32 LVPs were required.

**Table S3: Large volume paracentesis plus human albumin costs per procedure per person**

|                                     | Dose/units | Total cost        | Source (units; costs) |
|-------------------------------------|------------|-------------------|-----------------------|
| <b>Procedure costs</b>              |            |                   |                       |
| Sundries                            | 1.00       | € 193.00          | [3]                   |
| <b>Consumables</b>                  |            |                   |                       |
| Catheter and pack                   | 1.00       | € 17.55           | KOL; KOL              |
| Connector                           | 1.00       | € 0.30            |                       |
| Drain                               | 1.00       | € 0.75            |                       |
| 2L drainage bag                     | 1.00       | € 0.40            |                       |
| Human albumin (unit = dose)         | 73.6 g     | € 271.58          | KOLs; [1]             |
| <b>Nurse (units = hours)</b>        | 2.00       | € 48.46           | KOL; [4]              |
| <b>Hospital stay (units = days)</b> |            |                   |                       |
| Day case                            | 1.00       | € 588.00          | KOLs; [3]             |
| <b>Total costs</b>                  |            | <b>€ 1,120.04</b> |                       |

## B. Adverse Event Costs

### *Shunt dysfunction*

A summary of the costs associated with shunt dysfunction is detailed in the table below.

Shunt dysfunction is applicable for both indications 1 and 2 and required re-intervention. In this population, 72.5% of re-interventions required angioplasty according to expert opinion. For the remaining cases, the method of management was to introduce a balloon expandable stent and, in some cases, a second graft stent (i.e. VIATORR or a bare stent). The proportion who required a second graft stent varied by indication (see table below for details).

**Table S4: Total cost per shunt dysfunction, by indication**

|                                                          | Unit costs | Percentage receiving procedure | Total costs       | Source [costs; %] |
|----------------------------------------------------------|------------|--------------------------------|-------------------|-------------------|
| Angioplasty                                              | € 2,758.00 | 72.5%                          | € 1,999.55        | [3]; KOLs         |
| TIPSS reintervention                                     |            | 27.5%                          |                   |                   |
| Balloon expandable stent                                 | € 4,056.04 | 100%                           | € 1,115.41**      | [7]*; KOLs        |
| Non-elective TIPSS (Indication 1)                        | € 2,812.00 | 10%                            | € 77.33**         | GORE: KOLs        |
| Non-elective TIPSS (Indication 2)                        | € 2,812.00 | 100%                           | € 773.30**        |                   |
| <b>Total cost shunt dysfunction – indication 1 (AVB)</b> |            |                                | <b>€ 3,192.29</b> |                   |
| <b>Total cost shunt dysfunction – indication 2 (RA)</b>  |            |                                | <b>€ 3,888.26</b> |                   |

\* Annual inflation rates calculated using OECD data on healthcare expenditure per capita in Spain which is reported between 2015-2019 [8]. The annual inflation rate for 2020 is assumed to be equal to the mean inflation rate for 2015-2019.

\*\* Calculated by multiplying it by 27.5% (i.e. 1 – 72.5%).

### *Variceal bleeding*

The table below outlines the cost associated with recurrent variceal bleeding adverse event for indication 1. For indication 2, the cost of treating recurrent bleeding, as estimated for the TIPSS arm (€4,279), was applied for the TIPSS and LVP treatment arms.

**Table S5: Variceal bleeding cost per person (indication 1)**

|                        | TIPSS |             | EBL   |             | Source [units; costs] |
|------------------------|-------|-------------|-------|-------------|-----------------------|
|                        | Units | Total costs | Units | Total costs |                       |
| Endoscopy              | 1.00  | € 669.90    | 1.00  | € 669.90    | KOL; [5]              |
| Pharmacotherapy        |       |             |       |             |                       |
| Terlipressin           | 0.075 | € 28.99     | 0.075 | € 28.99     | KOL; [1]              |
| Somatostatin           | 0.700 | € 151.77    | 0.700 | € 151.77    |                       |
| Octreotide             | 0.225 | € 17.80     | 0.225 | € 17.80     |                       |
| TIPSS (rescue therapy) | NA    | NA          | 0.5   | € 2,141.68* | Table S1              |
| EBL sessions           | NA    | NA          | 0.14  | € 448.30    | Table S2              |
| Hospital admission     |       |             |       |             |                       |
| Non-elective days      | 5.10  | € 2,998.80  | 7.97  | € 4,686.36  | [3]                   |

|              |       |                   |       |                   |     |
|--------------|-------|-------------------|-------|-------------------|-----|
| ICU          | 25.0% | € 411.25          | 25.0% | € 411.25          | [3] |
| <b>TOTAL</b> |       | <b>€ 4,278.51</b> |       | <b>€ 8,556.06</b> |     |

\* Unit costs based on TIPSS stent cost, consumables, and procedure costs.

### *Ascites*

The table below details the costs associated with ascites adverse event for indication 1. It was assumed that all ascites episodes are either grade two or three, based on grade 1 ascites being undetectable without an ultrasound. Grade 2 ascites was treated with diuretics with reduced salt intake. Grade three was treated with LVP and diuretics where repeat LVP sessions may be required if unresolved.

Cost of spironolactone is based on fifty 25mg tablets costing €2.50 [1]. Based on expert opinion, 100mg daily dose was applied in the model for 3 months.

**Table S6: Ascites adverse event cost per person (indication 1)**

|                                                      | Dose/units   | Total costs      | Source [units; costs] |
|------------------------------------------------------|--------------|------------------|-----------------------|
| <b>Grade 2</b>                                       |              |                  |                       |
| Spironolactone                                       | 100 mg daily | €18.26           | KOLs; [1]             |
| <b>Grade 3</b>                                       |              |                  |                       |
| Spironolactone                                       | 100 mg daily | €18.26           | KOLs; [1]             |
| LVP                                                  | 1.20         | €1,300.44*       | KOLs                  |
| Procedure                                            | 1.00         | €193.00          | KOLs; [3]             |
| Consumables                                          | 1.00         | €290.58          | KOLs; KOLs            |
| Nurse (unit = hours)                                 | 0.50         | €12.12           | KOLs; [4]             |
| Hospital cost (day case)                             | 1.00         | €588.00          | KOLs; [3]             |
| <b>Total cost per ascites episode (indication 1)</b> |              | <b>€668.48**</b> |                       |

\* Calculated by taking the product of 1.2 units and sum of parameters making up the LVP procedure.

\*\* Based on an equal weighting of 50% for grade 2 and 3 events.

For indication 2, following drainage of the accumulated fluid post TIPSS implantation, patients treated with TIPSS may still suffer a recurrence of refractory ascites that require a session of LVP. One session of LVP was estimated to cost **€1,120** based on 2 hours of nurse time (€48.46), procedure cost, consumables, and hospital day case cost.

### *Hepatic Encephalopathy (HE)*

The table below outlines the cost of treating HE. Two forms of HE was considered in the model: mild and severe. However, according to expert opinion, there was no difference in management between the two in the Spanish setting.

**Table S7: Hepatic encephalopathy average event cost per person**

|                                       | Dose          | Percentage receiving procedure | Total costs      | Source [%; costs] |
|---------------------------------------|---------------|--------------------------------|------------------|-------------------|
| Lactulose <sup>a</sup>                | 80g daily     | 100%                           | €69.15           | KOLs; [1]         |
| Rifaximin <sup>b</sup>                | 1,200mg daily | 100%                           | €840.99*         | KOLs; [1]         |
| TIPSS re-intervention                 | NA            | 5%                             | €343.40**        | KOLs; Table S1    |
| <b>Total cost of HE (mild/severe)</b> |               |                                | <b>€1,253.54</b> |                   |

<sup>a</sup> 100 mg of lactulose for oral use cost €2.84 [1].

<sup>b</sup> 12 pack of 200 mg rifaximin tablets cost €9.21 [1].

\* Based on administering treatment for 6 months.

\*\* TIPSS re-intervention include consumables, healthcare professionals, 2 bed days (all estimated to be €5,459) & management with balloon stent (estimated to be €1,409).

### *Spontaneous Bacterial Peritonitis (SBP)*

The cost associated with the management of SBP is outlined in the table below. Cost of albumin was estimated based on a 50ml solution containing 10g of albumin costing €36.90 [3]. Cost of ciprofloxacin was estimated based on a 14 pack tablets costing €3.28 [1]. Cost of cefotaxime was estimated based on a 1g vial costing €3.12 [1].

**Table S8: Spontaneous Bacterial Peritonitis adverse event cost per person**

|                                                   | Units | Total costs      | Source [units; costs] |
|---------------------------------------------------|-------|------------------|-----------------------|
| IV albumin (87.5 mg)                              | 2.00  | €645.76          | [9]; [1]              |
| Non-elective excess days                          | 3.50  | €2,058.00        | KOLs; [3]             |
| <b>Antibiotics</b>                                |       |                  |                       |
| Cefotaxime 5-day course (4 g daily for 5 days)*   | 0.75  | €8.15            | [9]; [1]              |
| Ciprofloxacin 7-day course (1 g daily for 7 days) | 0.25  | €0.59            | KOLs; [1]             |
| <b>Total cost of SBP</b>                          |       | <b>€2,752.50</b> |                       |

\* EASL clinical guidelines SBP (2010) [9]

## C: Sensitivity and Scenario Analysis Inputs

Probabilistic sensitivity analysis inputs for indications 1 and 2.

Table S9: PSA parameters for indication 1 (AVB)

| Parameters                                      | Mean     | Standard Error | Distribution | Alpha  | Beta  |
|-------------------------------------------------|----------|----------------|--------------|--------|-------|
| <b>Survival rates</b>                           |          |                |              |        |       |
| Survival rate Pharmaceuticals + EBL (12 months) | 0.61     | 0.09           | Beta [0,1]   | 16.72  | 10.69 |
| Survival rate TIPS (12 months)                  | 0.86     | 0.13           | Beta [0,1]   | 5.36   | 0.87  |
| Survival rate Pharmaceuticals + EBL (24 months) | 0.61     | 0.09           | Beta [0,1]   | 16.72  | 10.69 |
| Survival rate TIPS (24 months)                  | 0.86     | 0.13           | Beta [0,1]   | 5.36   | 0.87  |
| <b>TIPs Procedure</b>                           |          |                |              |        |       |
| Rate of technical success                       | 0.98     | 0.01           | Beta [0,1]   | 117.18 | 2.39  |
| Pre-procedure consultation time                 | 0.17     | 0.03           | Gamma        | 44.44  | 0.00  |
| Procedure time (first implant)                  | 2.00     | 0.30           | Gamma        | 44.44  | 0.05  |
| Procedure time (addition for tech failure)      | 2.00     | 0.30           | Gamma        | 44.44  | 0.05  |
| Unit Costs Consumables: Balloon Catheter        | € 352.02 | € 52.80        | Gamma        | 44.44  | 7.92  |
| Unit Costs Consumables: X-ray dye               | € 54.97  | € 8.25         | Gamma        | 44.44  | 1.24  |
| Unit Costs HCP: Hepatologist                    | € 25.27  | € 3.79         | Gamma        | 44.44  | 0.57  |
| Unit Costs HCP: Radiologist                     | € 25.27  | € 3.79         | Gamma        | 44.44  | 0.57  |
| Unit Costs HCP: Radiologist Trainee             | € 11.83  | € 1.77         | Gamma        | 44.44  | 0.27  |
| Unit Costs HCP: Radiographer                    | € 16.92  | € 2.54         | Gamma        | 44.44  | 0.38  |
| Unit Costs HCP: Nurse                           | € 24.23  | € 3.63         | Gamma        | 44.44  | 0.55  |
| Unit Costs HCP: Anaesthetist                    | € 25.27  | € 3.79         | Gamma        | 44.44  | 0.57  |
| Unit Costs HCP: Anaesthetist nurse              | € 24.23  | € 3.63         | Gamma        | 44.44  | 0.55  |
| Unit Cost: Elective Excess Bed Day              | € 588.00 | € 88.20        | Gamma        | 44.44  | 13.23 |
| Resource Usage: Length of stay (elective)       | 2.00     | 0.30           | Gamma        | 44.44  | 0.05  |
| Unit Cost: Non-Elective Excess Bed Day          | € 588.00 | € 88.20        | Gamma        | 44.44  | 13.23 |
| Resource Usage: Length of stay (non-elective)   | 5.00     | 0.75           | Gamma        | 44.44  | 0.11  |
| Resource Usage: Length of stay (repeat)         | 2.00     | 0.30           | Gamma        | 44.44  | 0.05  |
| Unit Costs: Abdomen CT Scan                     | € 155.00 | € 23.25        | Gamma        | 44.44  | 3.49  |
| Unit Costs: Doppler ultrasound                  | € 67.00  | € 10.05        | Gamma        | 44.44  | 1.51  |
| Unit Costs: ECHO                                | € 92.00  | € 13.80        | Gamma        | 44.44  | 2.07  |
| Unit Costs: ECG                                 | € 150.00 | € 22.50        | Gamma        | 44.44  | 3.38  |
| Resource Usage: ECHO                            | 0.50     | 0.08           | Beta [0,1]   | 21.72  | 21.72 |
| <b>Pharmaceuticals + EBL Treatment Costs</b>    |          |                |              |        |       |
| Percentage using Carvedilol                     | 0.25     | 0.04           | Beta [0,1]   | 33.08  | 99.25 |



|                                                              |            |          |            |        |         |
|--------------------------------------------------------------|------------|----------|------------|--------|---------|
| Unit Costs: Inpatient EBL procedure                          | € 3,202.15 | € 480.32 | Gamma      | £44.44 | £72.05  |
| Unit costs: Outpatient EBL procedure                         | € 669.90   | € 100.49 | Gamma      | £44.44 | £15.07  |
| Resource Usage: EBL procedures month 1                       | 2.00       | 0.30     | Gamma      | 44.44  | 0.05    |
| <b>Follow-Up</b>                                             |            |          |            |        |         |
| Unit costs: Angiography                                      | € 305.00   | € 45.75  | Gamma      | 44.44  | 6.86    |
| Unit costs: Venography                                       | € 289.00   | € 43.35  | Gamma      | 44.44  | 6.50    |
| <b>Variceal bleeding</b>                                     |            |          |            |        |         |
| Rate of bleeding at 12 months (VIATORR)                      | 0.03       | 0.00     | Beta [0,1] | 43.08  | 1392.96 |
| Rate of bleeding at 12 months (EBL)                          | 0.47       | 0.07     | Beta [0,1] | 23.09  | 26.03   |
| Rate of bleeding at 24 months (VIATORR)                      | 0.03       | 0.00     | Beta [0,1] | 43.08  | 1392.96 |
| Rate of bleeding at 24 months (EBL)                          | 0.50       | 0.08     | Beta [0,1] | 21.72  | 21.72   |
| Treatment Strategy (Pharma + EBL): % TIPs                    | 0.50       | 0.08     | Beta [0,1] | 21.72  | 21.72   |
| Treatment Strategy (Pharma + EBL): % EBL                     | 0.14       | 0.02     | Beta [0,1] | 38.08  | 233.93  |
| Terlipressin (%)                                             | 0.08       | 0.01     | Beta [0,1] | 41.04  | 506.11  |
| Octreotide (%)                                               | 0.23       | 0.03     | Beta [0,1] | 34.22  | 117.87  |
| Resource Usage: Length of hospital stay (VIATORR)            | 5.10       | 0.77     | Gamma      | 44.44  | 0.11    |
| Resource Usage: Length of hospital stay (VIATORR)            | 7.97       | 1.20     | Gamma      | 44.44  | 0.18    |
| Unit costs: Critical care per FCE                            | € 1,645.00 | € 246.75 | Gamma      | 44.44  | 37.01   |
| Resource Usage: % requiring ICU stay (VIATORR)               | 0.25       | 0.04     | Beta [0,1] | 33.08  | 99.25   |
| Resource Usage: % requiring ICU stay (Pharma+ EBL)           | 0.25       | 0.04     | Beta [0,1] | 33.08  | 99.25   |
| <b>Reintervention</b>                                        |            |          |            |        |         |
| Probability of re-intervention following shunt dysfunction   | 0.07       | 0.03     | Beta [0,1] | 6.00   | 76.00   |
| Percentage re-intervention requiring angioplasty             | 0.73       | 0.11     | Beta [0,1] | 11.50  | 4.36    |
| Unit costs: Angiography                                      | € 2,758.00 | € 413.70 | Gamma      | 44.44  | 62.06   |
| Unit costs: balloon expandable stent                         | € 1,408.68 | € 211.30 | Gamma      | 44.44  | 31.70   |
| Resource Usage: % TIPs reintervention requiring second stent | 0.10       | 0.02     | Beta [0,1] | 39.90  | 359.10  |
| <b>Hepatic Encephalopathy</b>                                |            |          |            |        |         |
| Probability of HE at 12 months (VIATORR)                     | 0.28       | 0.04     | Beta [0,1] | 31.72  | 81.57   |
| Probability of HE at 12 months (Pharma + EBL)                | 0.40       | 0.06     | Beta [0,1] | 26.27  | 39.40   |

|                                                            |          |          |            |       |        |
|------------------------------------------------------------|----------|----------|------------|-------|--------|
| % of HE episodes classified as severe (VIATORR)            | 0.25     | 0.07     | Beta [0,1] | 5     | 24     |
| % of HE episodes classified as severe (Pharma + EBL)       | 0.25     | 0.11     | Beta [0,1] | 4     | 12     |
| Resource usage: % of HE requiring repeat TIPs procedure    | 0.05     | 0.01     | Beta [0,1] | 42.17 | 801.27 |
| <b>Ascites</b>                                             |          |          |            |       |        |
| Probability of ascites at 12 months (VIATORR)              | 0.13     | 0.02     | Beta [0,1] | 38.54 | 257.90 |
| Probability of ascites at 12 months (EBL)                  | 0.33     | 0.05     | Beta [0,1] | 29.45 | 59.79  |
| Cost per Ascites episode (LVP procedure costs)             | € 668.48 | € 100.27 | Gamma      | 44.44 | 15.04  |
| <b>Utilities</b>                                           |          |          |            |       |        |
| Chronic liver disease Child-Pugh 2                         | 0.67     | 0.10     | Beta [0,1] | 14.00 | 6.89   |
| (Additional) disutility Chronic liver disease Child-Pugh 3 | 0.11     | 0.02     | Beta [0,1] | 39.45 | 319.15 |
| Disutility active bleeding                                 | 0.15     | 0.02     | Beta [0,1] | 37.44 | 205.36 |
| Disutility TIPs (initial implant & shunt dysfunction)      | 0.15     | 0.02     | Beta [0,1] | 37.44 | 205.36 |
| Disutility mild HE                                         | 0.07     | 0.01     | Beta [0,1] | 41.26 | 548.21 |
| (Additional) disutility severe HE                          | 0.06     | 0.01     | Beta [0,1] | 41.72 | 653.58 |
| Disutility ascites                                         | 0.13     | 0.02     | Beta [0,1] | 38.76 | 271.35 |

**Table S10: PSA parameters for indication 2 (RA)**

| Parameters                                 | Mean     | Standard Error | Distribution | Alpha   | Beta   |
|--------------------------------------------|----------|----------------|--------------|---------|--------|
| <b>TIPs Procedure</b>                      |          |                |              |         |        |
| Rate of technical success                  | 0.98     | 0.05           | Beta [0,1]   | 7.02    | 0.14   |
| Pre-procedure consultation time            | 0.17     | 0.04           | Gamma        | 16.00   | 0.01   |
| Procedure time (first implant)             | 2.00     | 0.30           | Gamma        | 44.44   | 0.05   |
| Procedure time (addition for tech failure) | 2.00     | 0.30           | Gamma        | 44.44   | 0.05   |
| Unit Costs Consumables: Balloon catheter   | € 352.02 | € 52.80        | Gamma        | € 44.44 | € 7.92 |
| Unit Costs Consumables: X-ray dye          | € 54.97  | € 8.25         | Gamma        | € 44.44 | € 1.24 |
| Unit Costs Consumables: Propofol           | € 2.58   | € 0.39         | Gamma        | € 44.44 | € 0.06 |
| Unit Costs Consumables: Antibiotics        | € 2.87   | € 0.43         | Gamma        | € 44.44 | € 0.06 |
| Unit Costs HCP: Hepatologist               | € 25.27  | € 3.79         | Gamma        | € 44.44 | € 0.57 |
| Unit Costs HCP: Radiologist                | € 25.27  | € 3.79         | Gamma        | € 44.44 | € 0.57 |
| Unit Costs HCP: Radiologist Trainee        | € 11.83  | € 1.77         | Gamma        | € 44.44 | € 0.27 |
| Unit Costs HCP: Radiographer               | € 16.92  | € 2.54         | Gamma        | € 44.44 | € 0.38 |
| Unit Costs HCP: Nurse                      | € 24.23  | € 3.63         | Gamma        | € 44.44 | € 0.55 |
| Unit Costs HCP: Anaesthetist               | € 25.27  | € 3.79         | Gamma        | € 44.44 | € 0.57 |

| Parameters                                               | Mean       | Standard Error | Distribution | Alpha   | Beta    |
|----------------------------------------------------------|------------|----------------|--------------|---------|---------|
| Unit Costs HCP: Anaesthetist nurse                       | € 24.23    | € 3.63         | Gamma        | € 44.44 | € 0.55  |
| Unit Cost: Elective Excess Bed Day                       | € 588.00   | € 88.20        | Gamma        | € 44.44 | € 13.23 |
| Resource Usage: Length of stay (elective)                | 2.00       | 0.30           | Gamma        | 44.44   | 0.05    |
| Unit Cost: Non-Elective Excess Bed Day                   | € 588.00   | € 88.20        | Gamma        | € 44.44 | € 13.23 |
| Resource Usage: Length of stay (non-elective)            | 5.00       | 0.75           | Gamma        | 44.44   | 0.11    |
| Resource Usage: Length of stay (repeat)                  | 2.00       | 0.30           | Gamma        | 44.44   | 0.05    |
| Unit Costs: Abdomen CT Scan                              | € 155.00   | € 23.25        | Gamma        | € 44.44 | € 3.49  |
| Unit Costs: Doppler ultrasound                           | € 67.00    | € 10.05        | Gamma        | € 44.44 | € 1.51  |
| Unit Costs: ECHO                                         | € 92.00    | € 13.80        | Gamma        | € 44.44 | € 2.07  |
| Unit Costs: ECG                                          | € 150.00   | € 22.50        | Gamma        | € 44.44 | € 3.38  |
| <b>LVP Costs</b>                                         |            |                |              |         |         |
| LVP frequency                                            | 2.17       | 0.33           | Gamma        | 44.44   | 0.05    |
| Unit Costs: Procedure cost/sundries                      | € 193.00   | € 28.95        | Gamma        | € 44.44 | € 4.34  |
| Unit Costs: Catheter and pack                            | € 17.55    | € 2.63         | Gamma        | € 44.44 | € 0.39  |
| Unit Costs: Connector                                    | € 0.30     | € 0.05         | Gamma        | € 44.44 | € 0.01  |
| Unit Costs: Drain                                        | € 0.75     | € 0.11         | Gamma        | € 44.44 | € 0.02  |
| Unit Costs: 2L Drainage bag                              | € 0.40     | € 0.06         | Gamma        | € 44.44 | € 0.01  |
| Unit Costs: Human Albumin                                | € 271.58   | € 40.74        | Gamma        | € 44.44 | € 6.11  |
| Nurse consultation time                                  | 2.00       | 0.30           | Gamma        | 44.44   | 0.05    |
| % Elective cases [if hospital patients]                  | 0.66       | 0.10           | Beta [0,1]   | 14.45   | 7.44    |
| Unit Costs: Elective inpatient                           | € 588.00   | € 88.20        | Gamma        | 44.44   | 13.23   |
| Unit Costs: Non elective inpatient                       | € 588.00   | € 88.20        | Gamma        | 44.44   | 13.23   |
| Resource Usage: Length of stay (elective & non-elective) | 2.80       | 0.42           | Gamma        | 44.44   | 0.06    |
| Mean LVP session per TIPs patient                        | 1.10       | 0.03           | Gamma        | 1526.96 | 0.00    |
| <b>Follow-Up</b>                                         |            |                |              |         |         |
| Unit costs: Angiography                                  | € 305.00   | € 45.75        | Gamma        | € 44.44 | € 6.86  |
| Unit costs: Venography                                   | € 289.00   | € 43.35        | Gamma        | € 44.44 | € 6.50  |
| <b>Ascites</b>                                           |            |                |              |         |         |
| Probability of recurrent ascites: 25 months              | 0.51       | 0.04           | Beta [0,1]   | 98.00   | 94.00   |
| <b>Recurrent Bleeding</b>                                |            |                |              |         |         |
| Rate of bleeding at 12 months (VIATORR)                  | 0.0440     | 0.02           | Beta [0,1]   | 3.78    | 82.13   |
| Rate of bleeding at 12 months (LVP)                      | 0.18       | 0.05           | Beta [0,1]   | 12.62   | 56.73   |
| Total cost per bleeding episode                          | € 3,914.61 | € 587.19       | Gamma        | € 44.44 | € 88.08 |

| Parameters                                                | Mean       | Standard Error | Distribution | Alpha   | Beta    |
|-----------------------------------------------------------|------------|----------------|--------------|---------|---------|
| Probability of reintervention following shunt dysfunction | 0.03       | 0.03           | Beta [0,1]   | 1.00    | 28.00   |
| % reintervention requiring angioplasty                    | 0.73       | 0.11           | Beta [0,1]   | 11.50   | 4.36    |
| Unit costs: Angioplasty                                   | € 2,758.00 | € 413.70       | Gamma        | € 44.44 | € 62.06 |
| Unit costs: balloon expandable stent                      | € 1,408.68 | € 211.30       | Gamma        | € 44.44 | € 31.70 |
| Probability of reintervention following shunt dysfunction | 0.03       | 0.03           | Beta [0,1]   | 1.00    | 28.00   |
| <b>Hepatic Encephalopathy</b>                             |            |                |              |         |         |
| Probability of HE at 12-months (VIATORR)                  | 0.35       | 0.09           | Beta [0,1]   | 10.00   | 19.00   |
| Probability of HE at 12 months (LVP)                      | 0.33       | 0.08           | Beta [0,1]   | 11.00   | 22.00   |
| % of HE episodes classified as severe (VIATORR)           | 0.40       | 0.15           | Beta [0,1]   | 4.00    | 6.00    |
| % of HE episodes classified as severe (LVP)               | 0.64       | 0.14           | Beta [0,1]   | 7.00    | 4.00    |
| Unit costs: Lactulose                                     | € 69.15    | € 10.37        | Gamma        | € 44.44 | € 1.56  |
| Unit costs: Rifaximin                                     | € 840.99   | € 126.15       | Gamma        | € 44.44 | € 18.92 |
| Resource usage: % of HE requiring repeat TIPs procedure   | 0.05       | 0.01           | Beta [0,1]   | 42.17   | 801.27  |
| <b>SBP</b>                                                |            |                |              |         |         |
| Probability of SBP at 12 months (LVP)                     | 0.06       | 0.04           | Beta [0,1]   | 2.00    | 31.00   |
| Resource usage: Mean LOS per SBP episode                  | 3.50       | 0.53           | Gamma        | 44.44   | 0.08    |
| Unit Costs: Consultant (medical oncology)                 | € 146.00   | € 21.90        | Gamma        | € 44.44 | € 3.29  |
| Unit Costs: IV albumin                                    | € 322.88   | € 48.43        | Gamma        | € 44.44 | € 7.26  |
| Unit Costs Ciprofloxacin                                  | € 2.34     | € 0.35         | Gamma        | € 44.44 | € 0.05  |
| Unit Costs Cefotaxime                                     | € 64.20    | € 9.63         | Gamma        | € 44.44 | € 1.44  |
| <b>Utilities</b>                                          |            |                |              |         |         |
| Chronic liver disease Child-Pugh 2                        | 0.65       | 0.10           | Beta [0,1]   | 14.91   | 8.03    |
| <b>Disutilities</b>                                       |            |                |              |         |         |
| Ascites                                                   | 0.13       | 0.02           | Beta [0,1]   | 38.76   | 271.35  |
| TIPs procedure (initial implant, shunt dysfunction)       | 0.15       | 0.02           | Beta [0,1]   | 37.44   | 205.36  |
| Active bleeding                                           | 0.15       | 0.02           | Beta [0,1]   | 37.44   | 205.36  |
| Hepatic Encephalopathy (mild)                             | 0.07       | 0.01           | Beta [0,1]   | 41.26   | 548.21  |
| Hepatic Encephalopathy (severe)                           | 0.13       | 0.02           | Beta [0,1]   | 38.54   | 257.90  |
| Spontaneous bacteria peritonitis                          | 0.12       | 0.02           | Beta [0,1]   | 38.99   | 285.93  |

### Scenario analysis – AVB (indication 1)

Scenario analysis inputs for indication 1 informed by the Nicoară-Farcău et al. (2021) [10] meta-analysis.

**Table S11: Scenario analysis clinical inputs – indication 1 (AVB)**

|                           | Indication 1: AVB  |                    |                                      |
|---------------------------|--------------------|--------------------|--------------------------------------|
|                           | TIPSS              | EBL                | Source                               |
| Survival at 12 months     | 0.790              | 0.620              | Nicoară-Farcău et al. (2021)<br>[10] |
| Survival at 24 months     | 0.790 <sup>a</sup> | 0.620 <sup>a</sup> |                                      |
| Recurrent VB at 12 months | 0.090              | 0.300              |                                      |
| Recurrent VB at 24 months | 0.090 <sup>b</sup> | 0.300 <sup>b</sup> |                                      |
| Ascites at 12 months      | 0.116              | 0.356              |                                      |
| HE at 12 months           | 0.350              | 0.260              |                                      |
| % HE severe               | 0.250              | 0.250              | Lv et al. (2019) [11]                |

<sup>a</sup>12-month survival is assumed to equal to 24-month survival

<sup>b</sup>12-month bleeding rates is assumed to equal to 24-month bleeding rates.

## D: Probabilistic Results

### Indication 1 (AVB)

Table S12: PSA results per person – AVB

|                                                                        | TIPSS      | EBL        | Incremental     |
|------------------------------------------------------------------------|------------|------------|-----------------|
| Total costs                                                            | € 8,914.00 | € 8,847.00 | € 66.00         |
| Total QALYs                                                            | 1.04       | 0.82       | 0.21            |
| Probabilistic ICER                                                     |            |            | <b>€ 309.00</b> |
| Probability TIPSS is cost saving                                       |            |            | <b>47%</b>      |
| Probability TIPSS is cost-effective at a threshold of €25,000 per QALY |            |            | <b>93%</b>      |

Abbreviations: QALYs – quality adjusted life year; ICER – incremental cost-effectiveness ratio; TIPSS – transjugular intrahepatic portosystemic stent shunt

Figure S1 Cost-effectiveness plane for AVB analysis

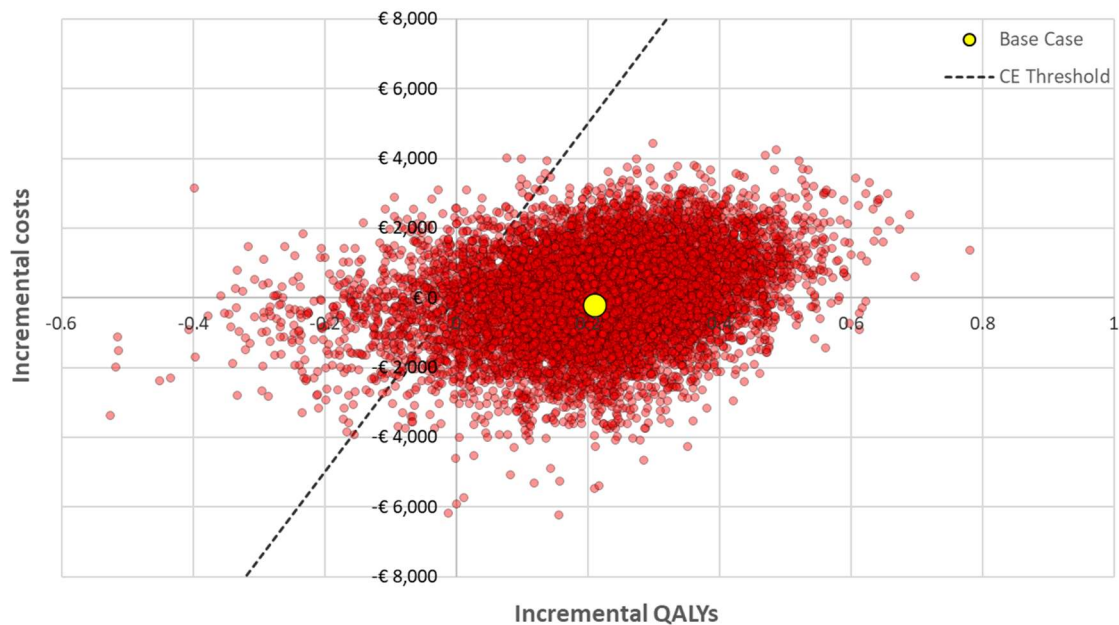

### Indication 2 (RA)

Table S13: PSA results per person – RA

|                                                                        | TIPSS      | LVP         | Incremental     |
|------------------------------------------------------------------------|------------|-------------|-----------------|
| Total costs                                                            | € 9,800.00 | € 35,130.00 | -€ 25,330.00    |
| Total QALYs                                                            | 1.03       | 0.60        | 0.42            |
| Probabilistic ICER                                                     |            |             | <b>Dominant</b> |
| Probability TIPSS is cost saving                                       |            |             | <b>100%</b>     |
| Probability TIPSS is cost-effective at a threshold of €25,000 per QALY |            |             | <b>100%</b>     |

Abbreviations: QALYs – quality adjusted life year; ICER – incremental cost-effectiveness ratio; TIPSS – transjugular intrahepatic portosystemic stent shunt

Figure S2 Cost-effectiveness plane for refractory ascites analysis

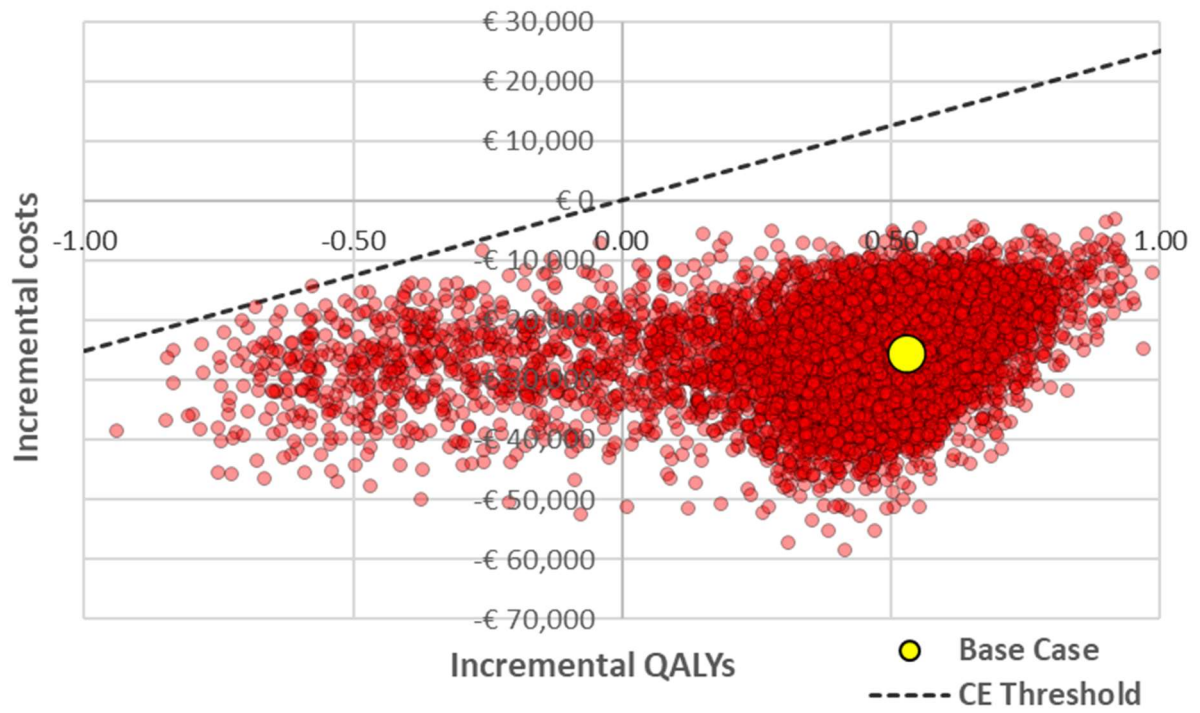

## References

1. Agencia Española de Medicamentos y Productos Sanitarios. 2021. Available from: <https://www.aemps.gob.es/?lang=ca>.
2. GORE. GORE 2021. Available from: Data on file.
3. Tarifas para la facturación de servicios sanitarios y docentes de Osakidetza para el año 2018. 2018.
4. Catalan Institute of Health (ICS). Remuneration book. In; 2020.
5. Condiciones económicas aplicables a la prestación de determinados servicios de asistencia sanitaria a través de medios ajenos, en el ámbito de gestión del Sescam. 2017.
6. Bureau C, Thabut D, Oberti F, Dharancy S, Carbonell N, Bouvier A, *et al*. Transjugular intrahepatic portosystemic shunts with covered stents increase transplant-free survival of patients with cirrhosis and recurrent ascites. *Gastroenterology*. 2017;152(1):157-63.
7. Gisbert R, Brosa M. Spanish healthcare costs and cost-effectiveness ratios database: eSalud [Internet]. Barcelona: Oblikue Consulting; 2018. Available from: <http://www.oblikue.com/bddcostes/>.
8. OECD. Health Spending 2021. Available from: <https://data.oecd.org/healthres/health-spending.htm>.
9. European Association for the Study of the L. EASL clinical practice guidelines on the management of ascites, spontaneous bacterial peritonitis, and hepatorenal syndrome in cirrhosis. *J Hepatol*. 2010;53(3):397-417.
10. Nicoară-Farcău O, Han G, Rudler M, Angrisani D, Monescillo A, Torres F, *et al*. Effects of early placement of transjugular portosystemic shunts in patients with high-risk acute variceal bleeding: a meta-analysis of individual patient data. *Gastroenterology*. 2021;160(1):193-205. e10.
11. Lv Y, Yang Z, Liu L, Li K, He C, Wang Z, *et al*. Early TIPS with covered stents versus standard treatment for acute variceal bleeding in patients with advanced cirrhosis: a randomised controlled trial. *The Lancet Gastroenterology & Hepatology*. 2019;4(8):587-98.
